# Supplementary material for: A cancer specific hypermethylation signature of the TERT promoter predicts biochemical relapse in prostate cancer: a retrospective cohort study
Source: PubMed Central journal article supplement (PMC5295385; doi:10.18632/oncotarget.10639), 2016-07-16
Supplement: oncotarget-07-57726-s001.pdf [file oncotarget-07-57726-s001.pdf]

## A cancer specific hypermethylation signature of the *TERT* promoter predicts biochemical relapse in prostate cancer: a retrospective cohort study

### Supplementary Materials

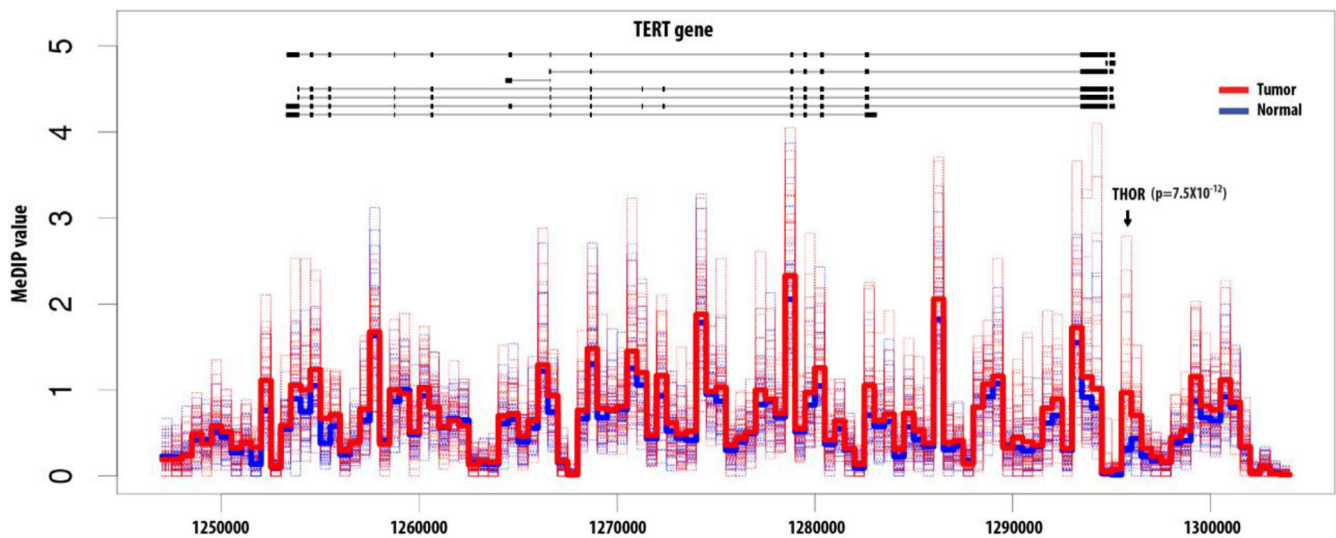

**Supplementary Figure S1: Methylation status of the *TERT* gene.** Methylation values of 51 tumours (dotted red lines) and their average (thick red line) as well as the methylation values of 53 normal prostate samples and their average (blue) are shown for 10000 bp wide regions in the *TERT* gene through MeDIP-seq analysis.

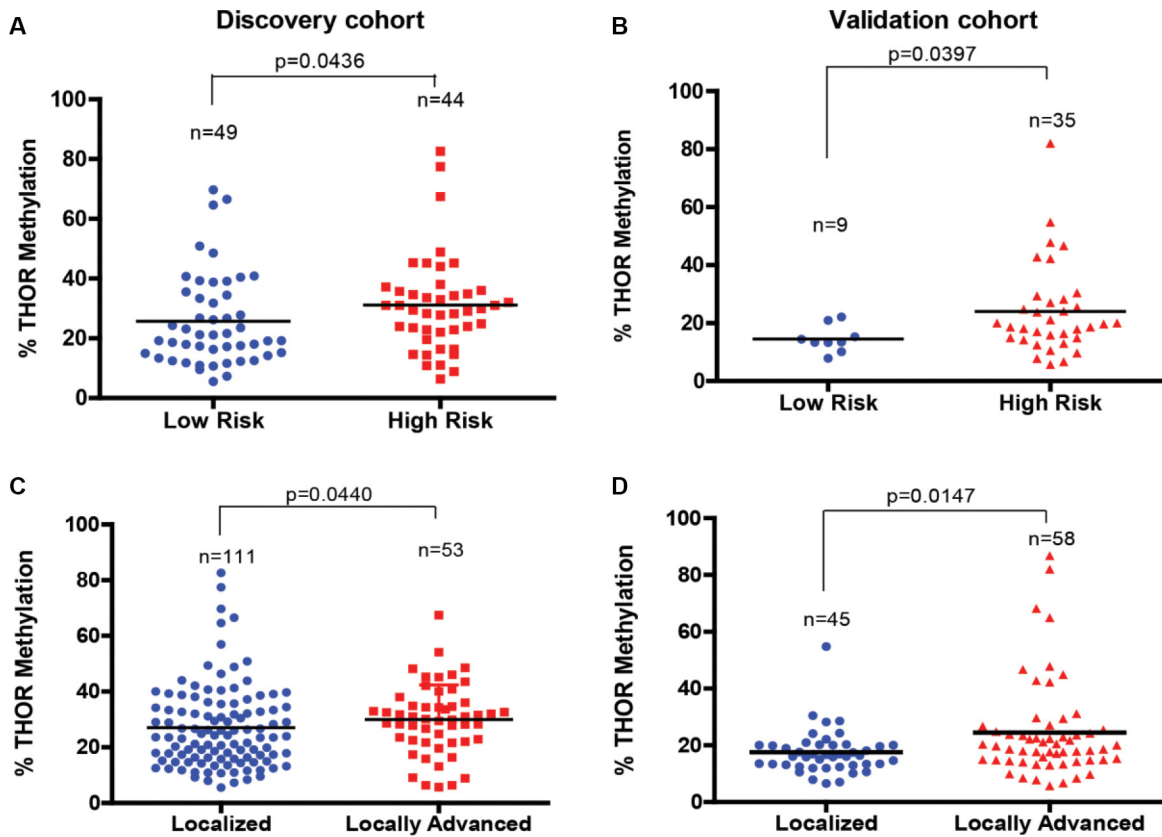

**Supplementary Figure S2: THOR methylation associates with high grade and invasive disease.** Pyrosequencing analysis shows significantly higher levels of THOR methylation in patients with high-risk disease both in the discovery (A) and validation cohorts (B). Localized disease presents significantly lower levels of THOR when compared to locally advanced stages in the discovery (C) and validation (D) cohorts.

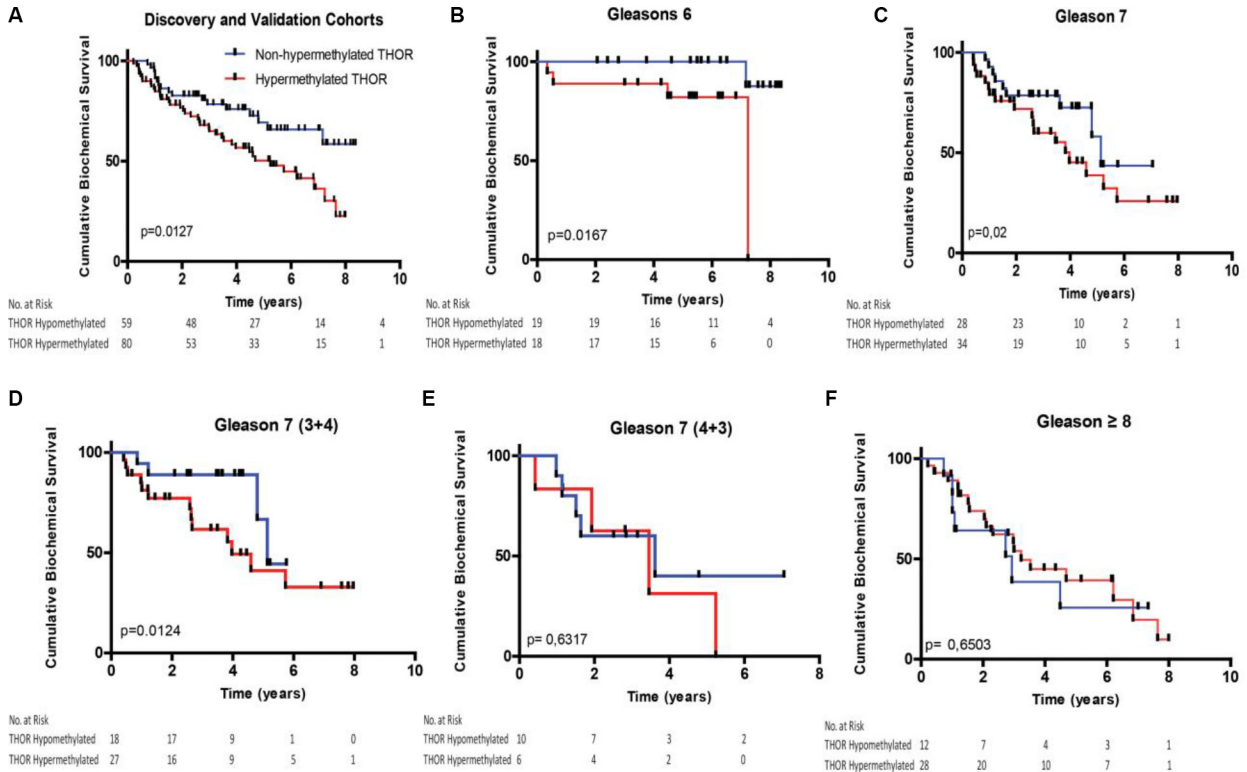

**Supplementary Figure S3: Levels of THOR methylation stratify lower risk prostate cancer patients.** (A) Biochemical recurrence reveals that patients from all Gleason scores and from both cohorts with low levels of THOR methylation show significantly better biochemical progression free survival when compared to patients with high levels of THOR methylation. (B) Gleason 6 patients are stratified by levels of THOR methylation. (C) THOR is not a significant marker to predict BPFS for intermediate Gleason 7 group at 8 years. (D) Gleason 7 (3 + 4) patients show a distinctive pattern of BPFS at 5 years when stratified by levels of THOR methylation. THOR doesn't show significant predictor value for patients with higher Gleason scores 7 (4 + 3) (E) and  $\geq 8$  (F).

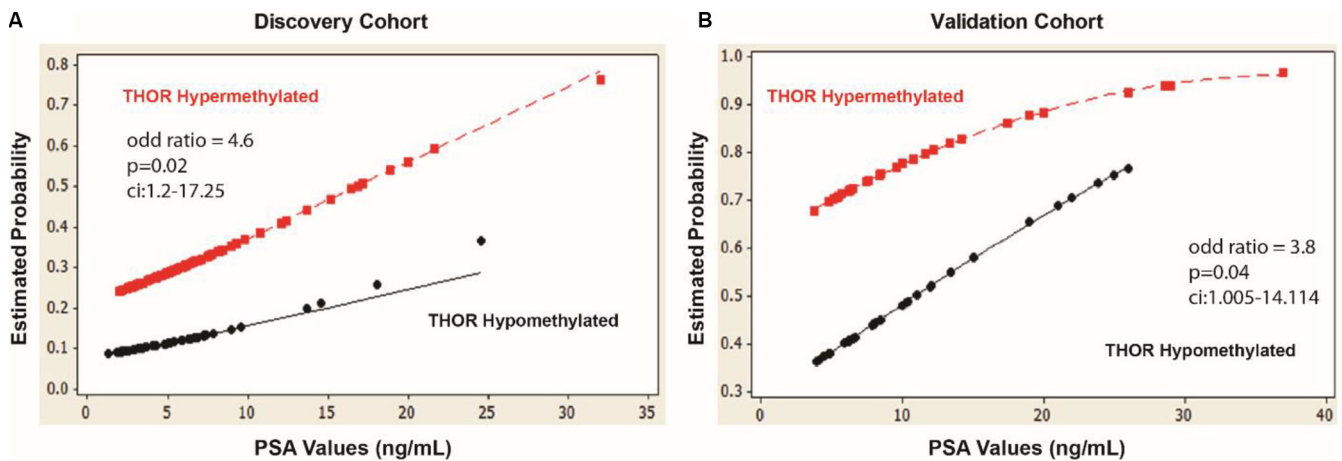

**Supplementary Figure S4: Patients with higher levels of THOR have increased probability of recurrence.** A significant increase in the probability of recurrence for the same values of PSA is observed in patients with high levels of THOR methylation in all samples from both the discovery (A) and validation cohorts (B).

**Supplementary Table S1: Sample sizes for tumor tissues in TCGA pan-cancer cohort**

| <b>Tumour Type</b>               | <b>Total</b> |
|----------------------------------|--------------|
| Acute Myeloid Leukemia           | 194          |
| Adrenocortical Cancer            | 80           |
| Bladder Urothelial Carcinoma     | 242          |
| Cervical and Endocervical Cancer | 179          |
| Colon Adenocarcinoma             | 275          |
| Esophageal Carcinoma             | 73           |
| Glioblastoma Multiforme          | 136          |
| Kidney Papillary Cell Carcinoma  | 156          |
| Brain Lower Grade Glioma         | 408          |
| Prostate Adenocarcinoma          | 300          |
| Sarcoma                          | 129          |
| Skin Cutaneous Melanoma          | 376          |
| Thyroid Carcinoma                | 508          |

**Supplementary Table S2: Correlation between THOR – Age, THOR –PSA**

| <b>Discovery Cohort</b>   |                 | <b>Validation Cohort</b> |                  |
|---------------------------|-----------------|--------------------------|------------------|
| <b>Age</b>                | <i>n</i> = 164  | <b>Age</b>               | <i>n</i> = 103   |
| Pearson Test              | <i>r</i> = 0.01 | Pearson Test             | <i>r</i> = 0.05  |
| <i>P</i> value            | 0.83 (NS)       | <i>P</i> value           | 0.59 (NS)        |
| <b>PSA</b>                | <i>n</i> = 164  | <b>PSA</b>               | <i>n</i> = 98    |
| Pearson Test              | <i>r</i> = 0.01 | Pearson Test             | <i>r</i> = 0.004 |
| <i>P</i> value            | 0.83 (NS)       | <i>P</i> value           | 0.96 (NS)        |
| <b>Prostate Volume</b>    | <i>n</i> = 153  | <b>Prostate Volume</b>   | <i>n</i> = 101   |
| Pearson Test              | <i>r</i> = 0.01 | Pearson Test             | <i>r</i> = 0.042 |
| <i>P</i> value            | 0.83 (NS)       | <i>P</i> value           | 0.67 (NS)        |
| <b><i>TMPRSS2-ERG</i></b> | <i>n</i> = 148  |                          |                  |
| Mann-Withney              |                 |                          |                  |
| <i>P</i> Value            | 0.737           |                          |                  |

THOR- Prostate volume and THOR – *ERG* gene.
